# Supplementary material for: The teneurin C-terminal domain possesses nuclease activity and is apoptogenic
Source: PubMed Central journal article supplement (PMC5898268; doi:10.1242/bio.031765), 2018-03-15
Supplement: biolopen-7-031765-s1.pdf [file biolopen-7-031765-s1.pdf]

**Fig. S1. The domain organization of teneurin-1 and the sequences that were expressed or purified in this study.** The amino acid sequence of human teneurin-1 with the various domains indicated. The expressed protein is underlined, the furin cleavage site is indicated in red, and the GHH toxin domain is in italics. The amino acid sequences of the two human and two chicken CTDs are also shown, with the furin cleavage sites in red and the region corresponding to the GHH toxin domain in italics.

### **Intracellular domain**

MEQTDCPKYQPLPKVKHEMDLAYTSSSDESEDGRKPRQSYNSRETLHEYNOELRM  
 NYSQSRKRKEVEKSTQEMEFCESTHTLCSGYQTDMSVSRHGYLEMGSDVDTE  
 TEGAASPDHALRMWIRGMKSEHSSCLSSRANSALS LTD DHERKSDGENGFKFS P  
 VCCDMEAQAGSTQDVQSSPHNQFTFRPLPPPPPPHACTCARKPPPAADSLQRRS  
 MTTRSQPSPAAPAPTSTQDSVHLHNSWVLSNIPLRTRHFLFKHSGSSAIFSA  
 ASQNYPLTSNTVYSPPPRPLPRSTFSRPAFTFNKPYRCCNWK

### **Transmembrane domain**

CTALSATAITVTLALLLAYVIAV

### **Beginning of extracellular domain**

HLFGLTWQLQPVEGELYANGVSKGNRGTESMDTTYSPIGGKVSDKSEKKVFQKGR  
 AIDTGEVDIGAQMOTIPPLGLFWRWFQITIHHPHYLKFNISLAKDSSLGIYGRNI  
 PPTHQFDFVKLMDGKQLVKQDSKGSDDTQHSPRNLIILTSLQETGFIEYMDQGPW  
 YLAFYNDGKKMEQVFVLTTAIEIM

### **EGF-like domains**

DDCSTNCNGNGECISGHCHCFPGFLGPDCARDSCPVLCGGNGEYKGGHCVCRHW  
 KGPECDVPEEQCIDPTCFGHGTCIMGVCICVPGYKGEICEEEDCLDPMCSNHGIC  
 VKGECHCSTGWGGVNCETPLPVCQEQC SGHGTFLLDAGVCS CDPKWTGSDCSTEL  
 CTMECGSHGVCSRIGICQCEEGWVGPTCEERSCHSHCTEHGQCKDGKCECSPGWE  
 GHCTIAHYLDAVRDGCPLCFGNGRCTL DQNGWHCV CQVGVSGTGCV

### **C-rich domain**

VMEMLCGDNLDNDGDGLTDCVDPDCCQQSNCYISPLCQ

GSPDPLDLIQQSQTLFSQHTSRLFYDRIKFLIGKDSTHVIPPEVSFDSRRACVIR  
 GQVVAIDGTPLVGVNVSFLHHSYDGTISRQDGSFDLVAIGGISVILIFDRSPFL  
 PEKRTLWLPWNQFIVVEKVTMQRVVS DPPSCDISNFISPNIIVLPSPLTSFGGSC  
 PERGTIVPELQVVQEEIPIPSFVRLSYLSSRTPGYKTLRILLTHSTIPVGMK

VHLTVAVEGRRLTQKWFPAAINLVYTFAWNKTDIYGQKVGWGLAEALVSVGYEYETC  
PDFILWEQRTVVVLQGFEMDASNLGGWSLNKHHILNPQSGIIHKNGENMFISQQP  
PV

### **6-bladed beta propeller**

ISTIMGNGHQRSVACTNCNGPAHNNKLFAPVALASGPDGSVYVGDVFNFVRRIFPS  
GNSVSI LELSTSPAHKYYLAMDPVSESLYLSDTNTRKVYKLSLVETKDLSKNFE  
VVAGTGDQCLPFDQSHCGDGRASEASLNSPRGITVDRHGFIYFVDGTMIRKIDE  
NAVITTVIGSNGLTSTQPLSCDSGMDITQVRLEWPTDLAVNPMDNSLYVLDNNIV  
LQISENRRVRIIAGRPIHCQ

### **YD-repeats and first half of the RHS-domain**

VPGIDHFLVSKVAIHSTLESARAI SVSHSGLLFIAETDERKVNRIQQVTTNGEIIY  
IIAGAPTDCCDKIDPNCDCFSGDGGYAKDAKMKAPSSLAVSPDGTLYVADLGNVR  
IRTI SRNQAHLNDMNIYEI ASPADQELYQFTVNGTHLHTLNLITRDYVYNFTYNS  
EGDLGAITSSNGNSVHIRRDAGGMPLWLVPVGGQVYWLTISSNGVLKRVSAQGYN  
LALMTYPGNTGLLATKSNENGWTTVY EYDPEGHLTNATFPTGEVSSFHS DLEKLT  
KVELDTSNRENVLMSTNL TATSTIYILKQENTQSTYRVNPDGSLRVTFASGMEIG  
LSSEPHILAGAVNPTLGKCNISLPGEHNANLIEWRQRKEQNKGNVSAFERRLRAH  
NRNLLSIDFDHITRTGKIYDDHRKF TLRILYDQTGRPI LWSPVSRYNEVNITYSP  
SGLVTFIQRTWNEKMEYDQSGKII SRTWADGKIWSYTYLEKSVMLLLHSQRRYI  
FEYDQPDCLLSVTMPMSMRHSLQTML SVGYRNIYTPPDSSTSF IQDYSRDGRL  
QTLHLGTGRRVLYKYTKQARLSEVLYD TTQVTLTYEESSGVIKTIHLMHDGFICT  
IRYRQTGPLIGRQIFRFSEGLVNARFDYSYNNFRV TSMQAVINETPLPIDLYRY  
VDVSGRTEQFGKFSVINYDLNQVITTTVMKHTKIF SANGQVIEVQYEILKAIAYW  
MTIQYDNVGRMVICDIRVGV DANITRYFY EYDADGQLQTVSVNDKTQWRYSYDLN  
GNINLLSHGKSARLTPLRYDLRDRITRLGEIQYKMD EDGFLRQRGNDIFEYNSNG  
LLQKAYNKASGWTVQY YDGLGRRVASKSSLGQHLQFFYADLTNPIRVTHLYNHT  
SSEITSLYYDLQGH LIAMELSSGEEYYVACDNTGTPLAVFSSRGQVIKEILYTPY  
GDIYHDTYPDFQVIIGFHGGLYDFLTKLVHLGQRDYDVVAGRWTTPNH HIWKQLN  
LLPKPFNLYSFENNYPVGKIQDVAKYTTDIRSWLELEFGFQLHNVLPGF PKPELEN  
LELTYELLRLQTKTQEWDPGKTILGIQCELOKQLRNFI SLDQLPMTPRYNDGRCL  
EGGKQPRFAAVPSVFGGKIKFAIKDGIVTADIIGVANEDSRRLAAI LNNAHYLEN  
LHFTIEGRDTHYFIKLGSL EEDLV LIGNTGGRRILENGVNVTVS QMTSVLNG

**Furin-cleavage site within the RHS-domain (**red**) and C-terminal domain (GHH Tox domain) in *italics***

RTRRFADIQLQHGALCFNIRYGTTVVEEK~~NHVLEIARQRAVAQAWTKEQRRLOEG~~  
EEGIRAWTEGEKQQLLSTGRVQGYDGYFVLSVEQYLELSDSANNIHFMRQSEIGR  
R

**Expressed human Teneurin-1 C-terminal domain (CTD) sequence (furin cleavage site in **red**, GHH toxin domain in *italics*):**

VTVSQMTSVLNG**RTRR**FADIQLQHGALCFNIRYGTTVVEEK~~NHVLEIARQRAVAQ~~  
~~AWTKEQRRLOEG~~EEGIRAWTEGEKQQLLSTGRVQGYDGYFVLSVEQYLELSDSAN  
NIHFMRQSEIGRR

**Expressed human Teneurin-2 C-terminal domain (CTD) sequence (furin cleavage site in **red**, GHH toxin domain in *italics*):**

TVSQPTLLVNG**RTRR**FTNIEFQYSTLLLSIRYGLTPDTLDEEKARVLDQARQRAL  
GTAWAKEQQKARDGREGSRLWTEGEKQQLLSTGRVQGYEGYYVLPVEQYPELADS  
SSNIQFLRQNEMGKR

**Purified chicken Teneurin-1 C-terminal domain (CTD) sequence (GHH toxin domain in *italics*):**

FADIQLQHGALCFNVRYGTTVVEEK~~NHVLEVARQRAVAQAWTKEQRRLOEG~~EEGI  
RAWTDGEKQQLLNTGRVQGYDGYFVLSVEQYLELSDSANNIHFMRQSEIGRR

**Purified chicken Teneurin-2 C-terminal domain (CTD) sequence (GHH toxin domain in *italics*):**

FTNIEFQYSTLLINIRYGLTADTLDEEKARVLDQARQRALGSAWAKEQQKARDGR  
EGSRVWTDGEKQQLLNTGRVQGYEGYYVLPVEQYPELADSSSNIQFLRQNEMGKR

**Fig. S2. Amino acid identity and similarity between teneurin C-terminal domains and the bacterial GHH toxins.** The GHH domains from three bacterial toxins were aligned with the corresponding amino acids from the C-terminal domains (CTDs) of representative teneurins (TOX) to illustrate the possibility that the teneurin CTD is an endonuclease.

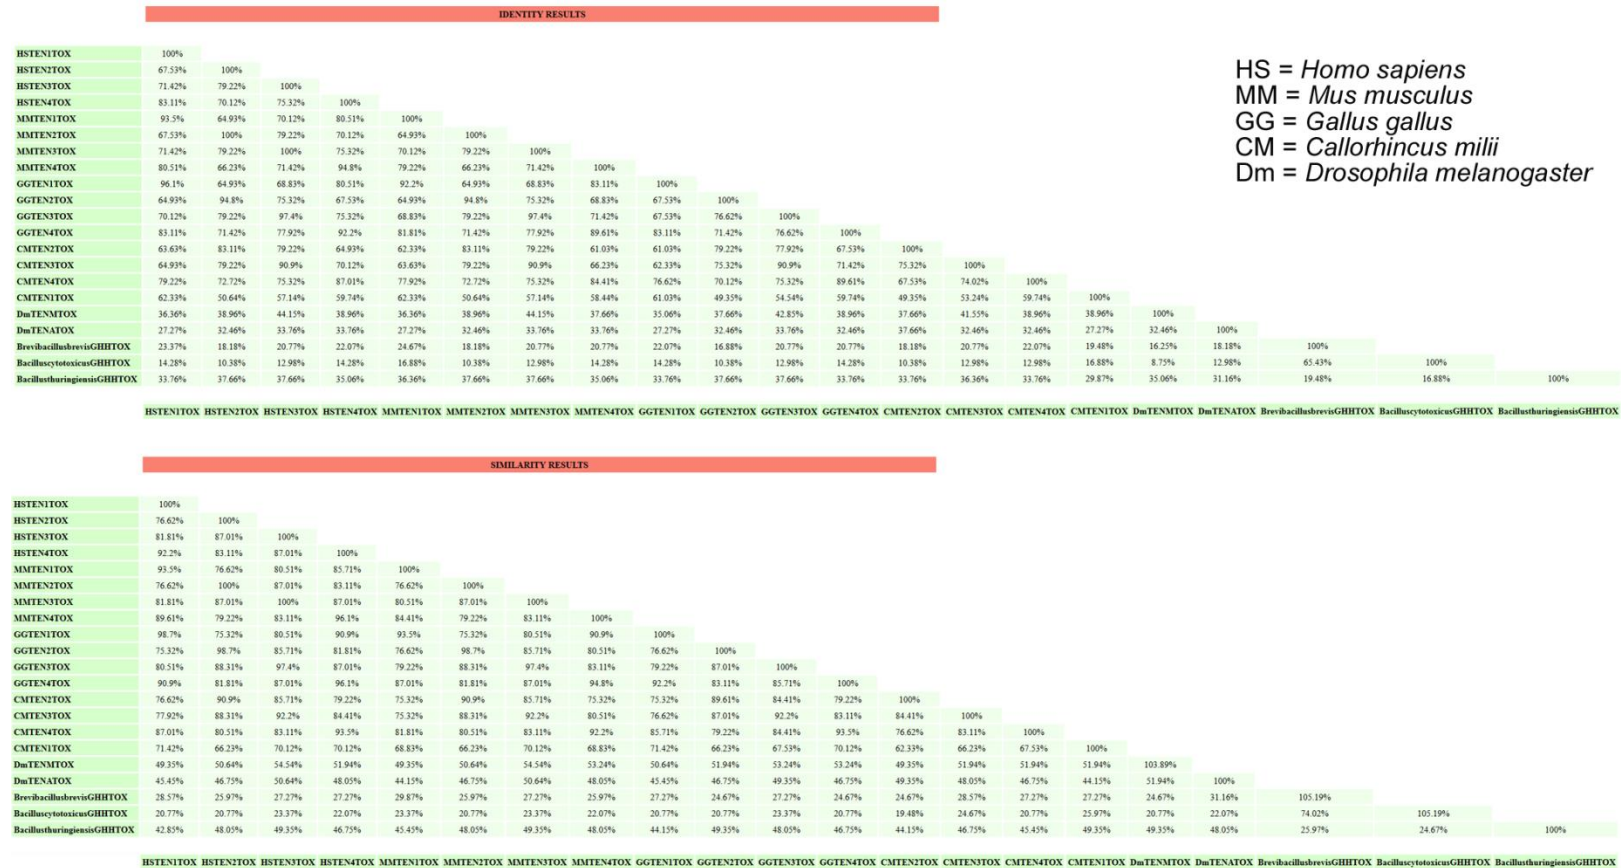

**Fig. S3. Purification of recombinant proteins.** Lanes from Coomassie blue-stained polyacrylamide gels showing the purified CTDs of chicken teneurin-1 and teneurin-2 used for cell culture and nuclease activity studies. The size ladder indicates apparent molecular weights in kDa.

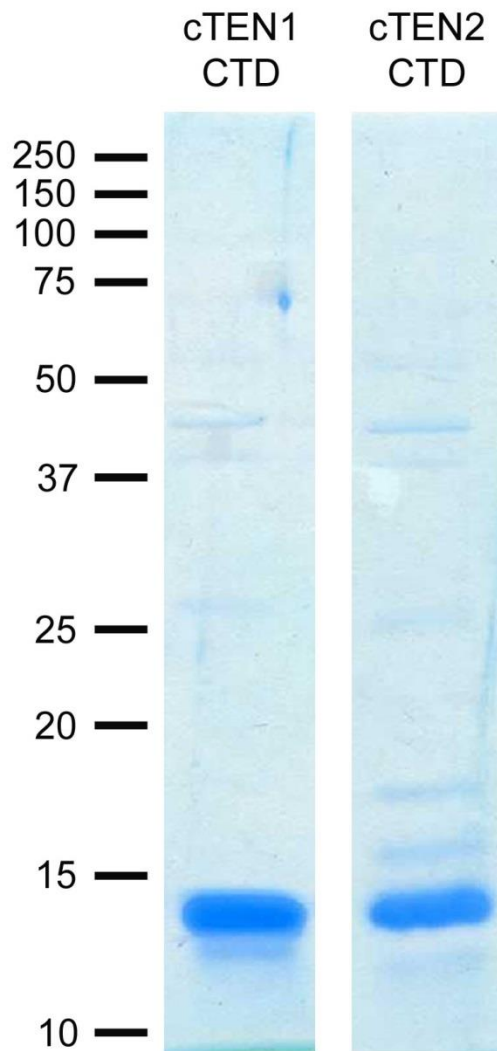

**Table S1. Transcriptional profiling of HEK293 cells expressing the teneurin-2 CTD.**

| Affyprobes | logFC    | FC              | AveExpr  | t        | P.Value  | adj.P.Val | geneID       | Gene name |
|------------|----------|-----------------|----------|----------|----------|-----------|--------------|-----------|
| 7903592    | -0.72145 | <b>0.606487</b> | 7.354426 | -12.5757 | 5.03E-08 | 8.33E-05  | NM_020775    | KIAA1324  |
| 7906878    | -0.67236 | <b>0.627478</b> | 7.214012 | -9.72767 | 7.41E-07 | 0.000403  | NM_001014796 | DDR2      |
| 7909610    | -0.6658  | <b>0.630338</b> | 7.822956 | -10.525  | 3.29E-07 | 0.000272  | NM_001040619 | ATF3      |
| 7914923    | -0.67225 | <b>0.627527</b> | 8.664322 | -8.30028 | 3.67E-06 | 0.000768  | NM_145047    | OSCP1     |
| 7918504    | -0.76381 | <b>0.588938</b> | 8.79511  | -8.34036 | 3.50E-06 | 0.000768  | NM_002557    | OVPG1     |
| 7919606    | -0.69246 | <b>0.618796</b> | 9.119708 | -5.54779 | 0.000153 | 0.004596  | NM_001024599 | HIST2H2BF |
| 7921916    | -0.59982 | <b>0.659835</b> | 7.830591 | -9.63692 | 8.16E-07 | 0.000406  | NM_003617    | RGS5      |
| 7927305    | 1.503777 | <b>2.835841</b> | 9.252199 | 3.594072 | 0.003997 | 0.027026  | NM_001144000 | AGAP5     |
| 7934979    | -1.16012 | <b>0.447475</b> | 8.087316 | -15.8307 | 4.18E-09 | 1.38E-05  | NM_014391    | ANKRD1    |
| 7937257    | -0.71473 | <b>0.609319</b> | 9.36582  | -3.5064  | 0.004675 | 0.029707  | NM_145651    | SCGB1C1   |
| 7937696    | -1.17705 | <b>0.442256</b> | 8.674062 | -19.0097 | 5.59E-10 | 2.78E-06  | NM_001004325 | KRTAP5-2  |
| 7938263    | -0.87302 | <b>0.546001</b> | 8.173645 | -6.09672 | 6.72E-05 | 0.002971  | NM_003754    | EIF3F     |
| 7948332    | -0.5969  | <b>0.661171</b> | 8.843283 | -7.0881  | 1.69E-05 | 0.001556  | NM_004811    | LPXN      |
| 7949124    | -0.71169 | <b>0.610605</b> | 8.297349 | -7.01971 | 1.85E-05 | 0.001598  | NM_005609    | PYGM      |
| 7959102    | -0.7667  | <b>0.587759</b> | 6.783417 | -8.20601 | 4.10E-06 | 0.000801  | NM_014365    | HSPB8     |
| 7985450    | -0.65561 | <b>0.634809</b> | 8.042572 | -3.68078 | 0.003425 | 0.024381  | NM_198181    | GOLGA6L9  |
| 7986250    | -0.64639 | <b>0.638877</b> | 10.61057 | -9.15753 | 1.37E-06 | 0.000593  | NM_001271    | CHD2      |
| 7990391    | -0.93391 | <b>0.523439</b> | 7.239254 | -12.1247 | 7.42E-08 | 9.41E-05  | NM_000499    | CYP1A1    |
| 8012951    | -0.97986 | <b>0.50703</b>  | 8.099792 | -8.85831 | 1.92E-06 | 0.000709  | NM_006382    | CDRT1     |
| 8018902    | -1.63346 | <b>0.322315</b> | 8.372967 | -26.4478 | 1.41E-11 | 1.40E-07  | NM_173628    | DNAH17    |
| 8034512    | -0.66339 | <b>0.631394</b> | 12.72709 | -3.14155 | 0.009025 | 0.043986  | NR_002751    | SNORD41   |
| 8044450    | -0.64022 | <b>0.641617</b> | 8.976154 | -9.88059 | 6.31E-07 | 0.000376  | NM_198581    | ZC3H6     |
| 8044669    | -0.74997 | <b>0.594617</b> | 6.139221 | -3.92222 | 0.002236 | 0.018966  | NM_013412    | RABL2A    |
| 8073015    | 0.590598 | <b>1.505871</b> | 8.841807 | 8.056205 | 4.92E-06 | 0.000858  | NM_006855    | KDEL3     |
| 8076612    | -0.76622 | <b>0.587957</b> | 7.321342 | -10.2007 | 4.55E-07 | 0.000337  | NM_022785    | EFCAB6    |
| 8087145    | -0.67592 | <b>0.625934</b> | 7.738101 | -8.44067 | 3.11E-06 | 0.000768  | NM_001407    | CELSR3    |
| 8090509    | 0.621983 | <b>1.538989</b> | 8.029379 | 3.589539 | 0.004029 | 0.027123  | NM_004637    | RAB7A     |
| 8110032    | -0.59103 | <b>0.663869</b> | 8.910183 | -7.19709 | 1.46E-05 | 0.001474  | NM_153607    | CREBRF    |
| 8113103    | -0.77638 | <b>0.583831</b> | 7.527023 | -10.8112 | 2.48E-07 | 0.000247  | NM_001145678 | KIAA0825  |
| 8113483    | -0.92081 | <b>0.528211</b> | 8.496886 | -10.5983 | 3.06E-07 | 0.000272  | NM_001039763 | TMEM232   |
| 8116532    | -0.58961 | <b>0.664521</b> | 9.988008 | -4.7771  | 0.000522 | 0.008636  | NR_002591    | SNORD95   |
| 8124448    | -0.80405 | <b>0.572738</b> | 11.50295 | -12.6511 | 4.72E-08 | 8.33E-05  | NM_003543    | HIST1H4H  |

**Table S1. Transcriptional profiling of HEK293 cells expressing the teneurin-2 CTD. (cont.)**

| Affyprobes | logFC    | FC              | AveExpr  | t        | P.Value  | adj.P.Val | geneID    | Gene name |
|------------|----------|-----------------|----------|----------|----------|-----------|-----------|-----------|
| 8128001    | -0.81901 | <b>0.566831</b> | 6.542142 | -14.1864 | 1.38E-08 | 3.42E-05  | NM_000735 | CGA       |
| 8133314    | -0.78137 | <b>0.581813</b> | 6.560076 | -4.64017 | 0.000655 | 0.009589  | NM_000265 | NCF1      |
| 8140211    | -0.66516 | <b>0.630617</b> | 9.648513 | -4.05341 | 0.001778 | 0.016774  | NR_003664 | SPDYE8P   |
| 8156160    | -1.61451 | <b>0.326575</b> | 7.891629 | -7.61267 | 8.53E-06 | 0.001162  | NM_017576 | KIF27     |
| 8159259    | -0.65752 | <b>0.633968</b> | 8.34969  | -8.54771 | 2.74E-06 | 0.000757  | NM_014582 | OBP2A     |
| 8163505    | 0.634357 | <b>1.552246</b> | 9.225563 | 7.482806 | 1.01E-05 | 0.001236  | NM_031219 | HDHD3     |
| 8164766    | -0.72428 | <b>0.605298</b> | 8.047926 | -12.1016 | 7.57E-08 | 9.41E-05  | NM_152572 | AK8       |
| 8165496    | 0.649239 | <b>1.568341</b> | 10.8664  | 4.995579 | 0.000366 | 0.006937  | NM_006088 | TUBB4B    |
| 8165672    | -1.20723 | <b>0.433099</b> | 6.809187 | -3.32621 | 0.006464 | 0.036244  | L23320    | RFC       |

**Table S2. FASTA files used for sequence analyses.**

>HSTEN1TOX  
EKNHVLEIARQRAVAQAWTKEQRRLLQEGEEGIRAWTEGEKQQLLSTGRVQGYDGYFVLSVEQYL  
ELSDSANNIHFM

>HSTEN2TOX  
EKARVLDQARQRALGTAWAKEQQKARDGREGSRLWTEGEKQQLLSTGRVQGYEGYYVLPVEQYP  
ELADSSSNIQFLR

>HSTEN3TOX  
EKARILEQARQRALARAWAREQQRVRDGEEGARLWTEGEKRQLLSAGKVQGYDGYVLSVEQYP  
ELADSANNIQFLR

>HSTEN4TOX  
EKARVLELARQRAVRQAWAREQQRLREGEGLRAWTEGEKQQVLSTGRVQGYDGGFFVISVEQYP  
ELSDSANNIHFM

>MMTEN1TOX  
EKNHVLEMARQRAVAQAWTQEQRRLQEGEEGTRVWTEGEKQQLLGTGRVQGYDGYFVLSVEQYL  
ELSDSANNIHFM

>MMTEN2TOX  
EKARVLDQARQRALGTAWAKEQQKARDGREGSRLWTEGEKQQLLSTGRVQGYEGYYVLPVEQYP  
ELADSSSNIQFLR

>MMTEN3TOX  
EKARILEQARQRALARAWAREQQRVRDGEEGARLWTEGEKRQLLSAGKVQGYDGYVLSVEQYP  
ELADSANNIQFLR

>MMTEN4TOX  
EKVRVLELARQRAVRQAWAREQQRLREGEGLRAWTDGEKQQVLNTGRVQGYDGGFFVTSVEQYP  
ELSDSANNIHFM

>GGTEN1TOX  
EKNHVLEVARQRAVAQAWTKEQRRLLQEGEEGIRAWTDGEKQQLLNTGRVQGYDGYFVLSVEQYL  
ELSDSANNIHFM

>GGTEN2TOX  
EKARVLDQARQRALGSAWAKEQQKARDGREGSRVWTDGEKQQLLNTGRVQGYEGYYVLPVEQYP  
ELADSSSNIQFLR

>GGTEN3TOX  
EKARILEQARQRALSSAWAREQQRVRDGEEGARLWTEGEKRQLLSAGKVQGYDGYVLSVEQYP  
ELADSANNIQFLR

>GGTEN4TOX



EKARVLELARQRAVAQAWAREQQRLRDGEEGIRSWTEGEKQQVLNTGRVQGYDGYFVISVEQYP  
ELSDSANNIHFM

>CMTEN2TOX

EQARLLEQARLRALANAWTREQQKARDGKEGGRLWTEGEKQQLLSAGRIQGYEGYYVLPVEQYP  
ELADSSTNIQFLR

>CMTEN3TOX

EKARILEQARQRALGCAWAREQQRVRDGEDGVRLWTEGEKQQLLSAAKVQGYDGYVLSVEQYP  
ELADSVSNIQFLR

>CMTEN4TOX

EKARVLELARQRAVTQAWAREDQRLRDGEEGVRSWTEGEKQQLLSTGRVQGYDGYFVTTVEQYP  
ELSDSVNNIHFM

>CMTEN1TOX

ERRHVLELAGQRAVARAWARERRRLGRGERGTRAWTEAERRQLLAGGRVPGYDGRAVLPPEQFA  
ELSDSPGNVRFVR

>DmTENMTOX

ERHRILKHAHKRAVERAWELEKQLVAAGFQGRGDWTEEEKEELVQHGDVDGWNGIDIHSIHKYP  
QLADDPGNVAFQRDAK

>DmTENATOX

EQQRLMHAKLTAVRKAWHREKEALRSGLTTALEWSQQETDEILKQSYANNYEGEYIHDVNLYP  
ELAEDPYNIKFVK

>BrevibacillusbrevisGHHTOX

EWNRRLLAKRRDAGVKEFWKQEKRRIKNGEPTTRNWTQEQKDAILSNQVPTFNGKPIIGHHAYSV  
SKYPHLANRGEIIPVT

>BacilluscytotoxicusGHHTOX

EWNKKFAKRWDKGVKEFWYQEQQRILNNEPLTREWSQEQDKDILAGKTPKFDGKPIAGHHSYSA  
AKYPHLADKGEIIPVT

>BacillusthuringiensisGHHTOX

LTDKQFSALRQKAVRHAWRQEKELIKKTGKGRDWTPEAKLELLQTGKVKGYEGQHMKSANEYP  
DFAGEPDNIQFLK
